# Supplementary material for: Glycine decarboxylase deficiency–induced motor dysfunction in zebrafish is rescued by counterbalancing glycine synaptic level
Source: JCI journal article supplement (doi:10.1172/jci.insight.124642), 2018-10-23
Supplement: sd1 [file 1]

AMINOACIDS AT 2 DPF

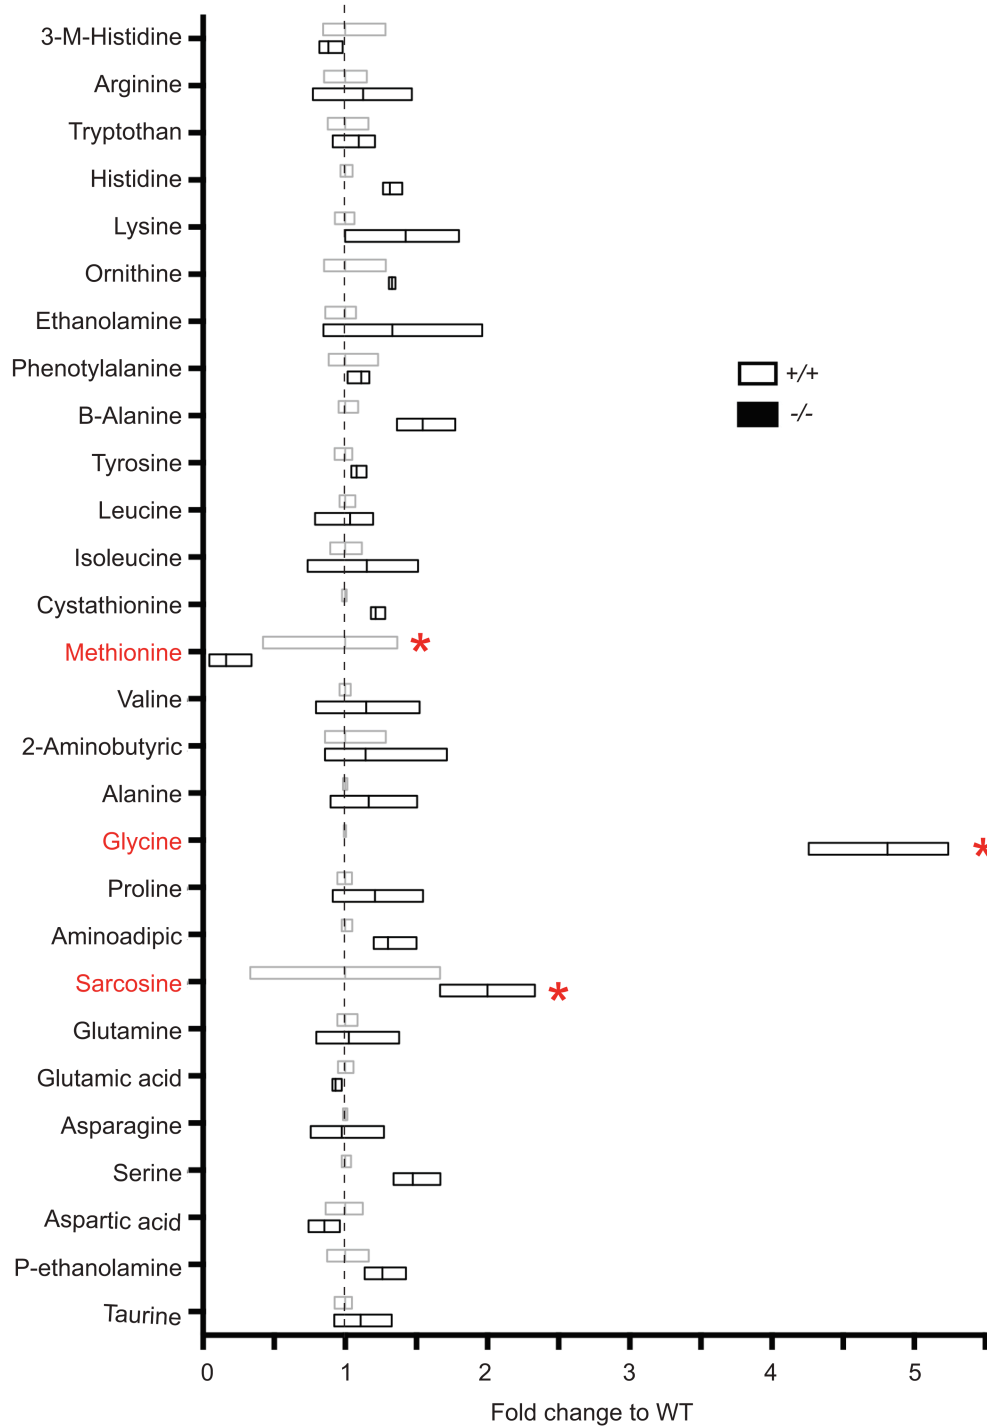

**Supplemental Figure 1:** LC-MS analysis of the levels of the main proteogenic and non-proteogenic amino acids at 2 dpf reveals a significant increase in sarcosine and glycine as well as a decrease in methionine level between *gldc* *-/-* and *+/+* embryos. Box and whiskers display min and max values and a line shows the median value.
